# Supplementary material for: In situ controllable growth of noble metal nanodot on graphene sheet
Source: Royal Society of Chemistry journal article supplement (doi:10.1039/c1jm11231g), 2011-01-01
Supplement: c1jm11231g.pdf [file c1jm11231g.pdf]

## *Supporting Information:*

# **In situ controllable growth of noble metal nanodot on graphene sheet**

Hui Zhang, Shuo Chen, Xie Quan\*, Hongtao Yu, Huimin Zhao

Key Laboratory of Industrial Ecology and Environmental Engineering (Ministry of Education, China), School of Environmental Science and Technology, Dalian University of Technology, Dalian 116024, China.

(4 pages, 7 figures)

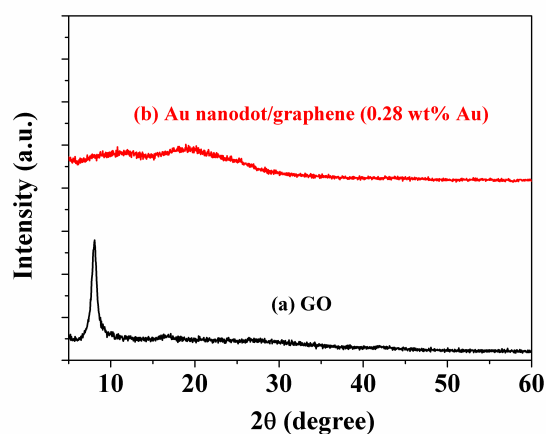

**Fig. S1** XRD patterns of (a) GO and (b) Au nanodot/graphene (0.28 wt% Au) composites.

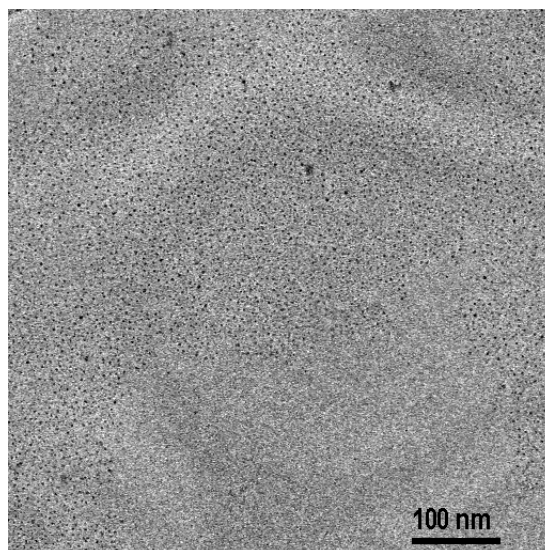

**Fig. S2** TEM images of different regions of the morphologies of Au nanodot in situ growth on graphene sheet (0.28 wt% Au).

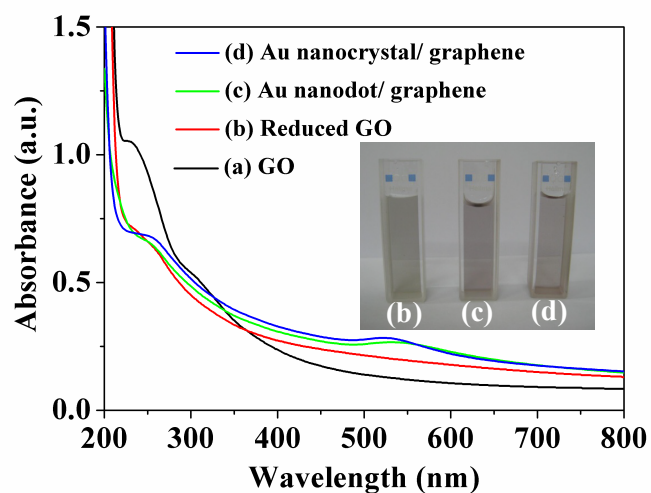

**Fig. S3** UV-vis spectra of (a) GO, (b) reduced GO, (c) Au nanodot/graphene composites (0.28 wt% Au) prepared by 0.03 mM HAuCl<sub>4</sub> with sonolytic process, and (d) Au nanocrystal/graphene composites prepared by 0.03 mM HAuCl<sub>4</sub> without sonolytic process.

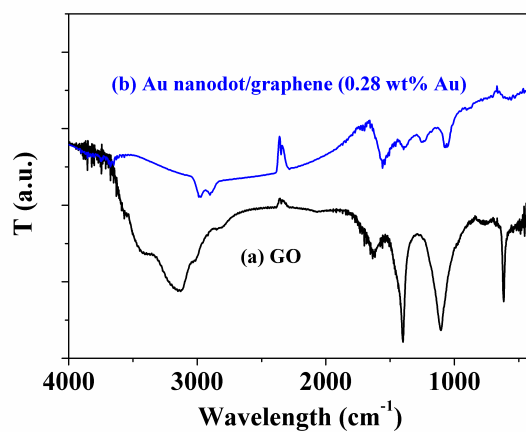

**Fig. S4** Fourier transform infrared (FTIR) spectra of (a) GO and (b) Au nanodot/graphene (0.28 wt% Au) composites.

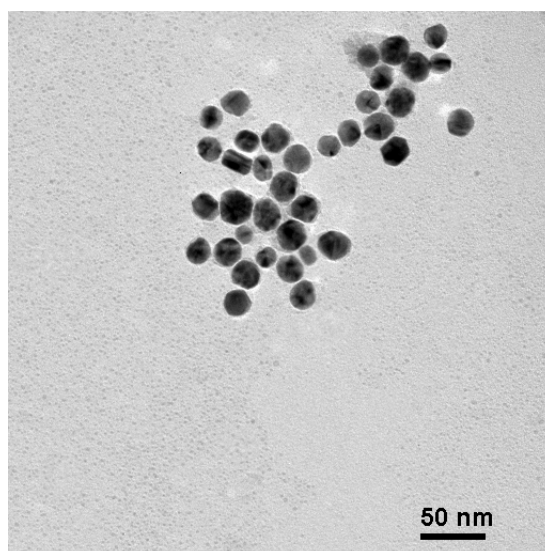

**Fig. S5** TEM images of Au nanodot/graphene composites. The concentration of HAuCl<sub>4</sub> in the initial solution was 0.1 mM. Au nanodot with a size of 2.3 nm was observed on the graphene sheet as well as a much bigger sized Au nanocrystal (15.70 nm).

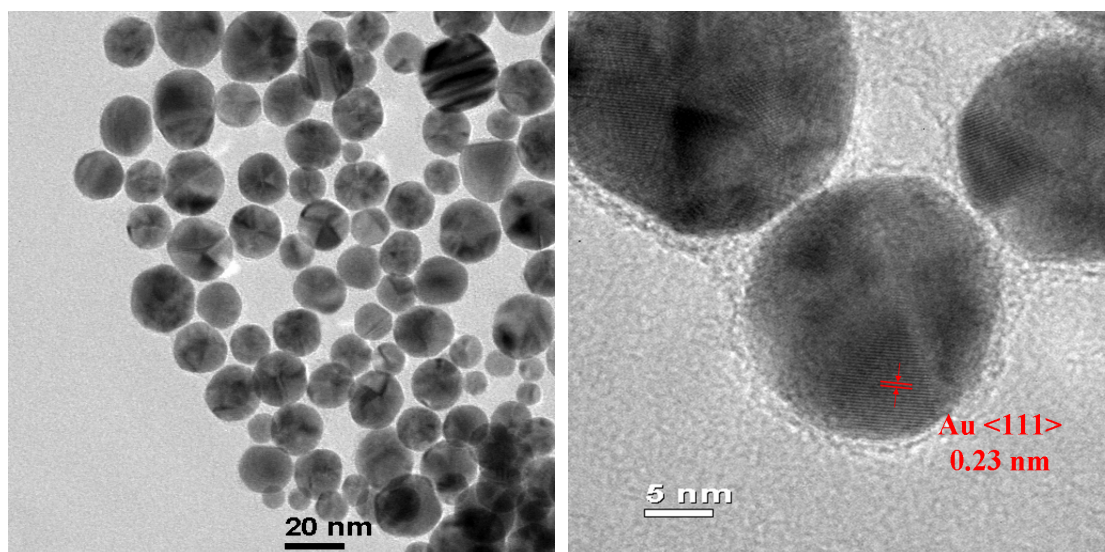

**Fig. S6** TEM images of Au nanocrystal/graphene composites (Au nanocrystal size: 18.8 nm) synthesized by hydrothermal method without sonolytic treatment. The concentration of  $\text{HAuCl}_4$  in the initial solution was 0.1 mM. High resolution TEM images of Au nanocrystal show a lattice fringe of  $2.3\text{\AA}$ , corresponding to Au  $\langle 111 \rangle$  planes.

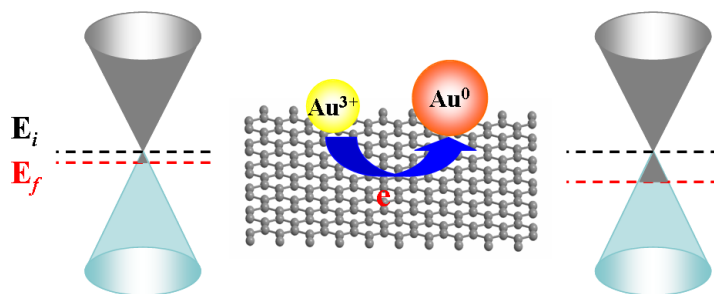

**Fig. S7** Modulation of electronic structure by  $\text{Au}^{3+}$  during sonolytic process.
